# Supplementary material for: Transcriptome Analysis Identifies Key Candidate Genes Mediating Purple Ovary Coloration in Asiatic Hybrid Lilies
Source: MDPI journal article supplement (doi:10.3390/ijms17111881), 2016-11-20
Supplement: s1 [file s1]

## Supplementary Materials: Transcriptome Analysis Identifies Key Candidate Genes Mediating Purple Ovary Coloration in Asiatic Hybrid Lilies

Leifeng Xu, Panpan Yang, Suxia Yuan, Yayan Feng, Hua Xu, Yuwei Cao and Jun Ming

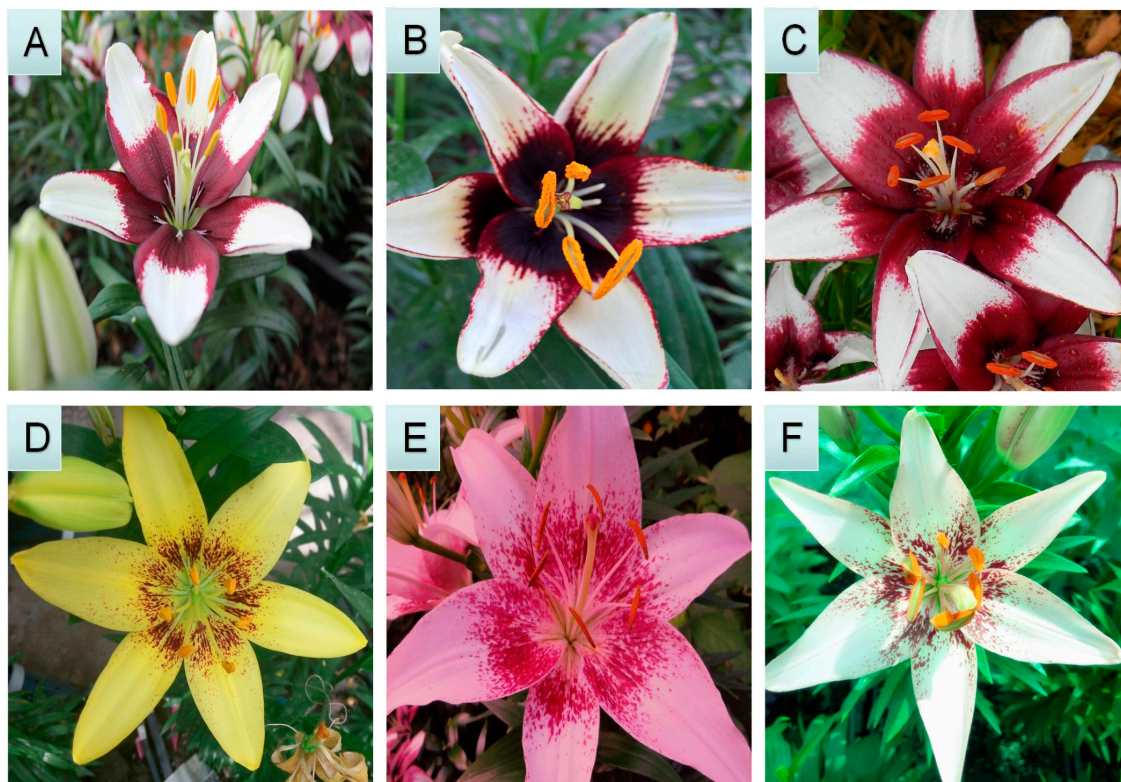

**Figure S1.** Flowers of six Asiatic hybrid lily cultivars: “Tiny Padhye” (A), “Black Eye” (B), “Dixie Jazz” (C), “Yellow Pixels” (D), “Dot.com” (E), and “Pink Pixels” (F).
